# Supplementary material for: Optimizing a backscatter forward operator using Sentinel-1 data over irrigated land
Source: Copernicus journal article supplement (doi:10.5194/hess-2021-273), 2021-06-14
Supplement: Supplementary file 1 [file hess-2021-273-supplement.pdf]

Supplementary Material

**Table S1:** The UMD-AVHRR 14 classes (Map code) classification (on the left) was used to reclassify the 23 classes-based PROBA-V LC map. On the right side of the table the PROBA-V land uses are displayed, together with the map codes for each land use. Additionally, the number of pixels, related to each class are shown, together with the UMD-AVHRR reclassification map code.

| UMD-AVHRR LC classification     |          | PROBA-V LC classification (23 classes)-100 m spatial resolution |          |                                    |                             |
|---------------------------------|----------|-----------------------------------------------------------------|----------|------------------------------------|-----------------------------|
| Land use                        | Map code | Land use                                                        | Map code | Number of pixels in the study area | UMD- AVHRR reclassification |
| Evergreen needle leaf forest    | 1        | Evergreen needle leaf closed forest                             | 111      | 1382                               | 1                           |
| Evergreen broad leaf forest     | 2        | Deciduous needle leaf closed forest                             | 113      | 0                                  | /                           |
| Deciduous needle leaf forest    | 3        | Evergreen broad leaf closed forest                              | 112      | 0                                  | /                           |
| Deciduos broad leaf open forest | 4        | Deciduos broad leaf closed forest                               | 114      | 409941                             | 4                           |
| Mixed forest                    | 5        | Mixed closest forest                                            | 115      | 165                                | 5                           |
| Woodland                        | 6        | Unknown closed forest type                                      | 116      | 55558                              | 5                           |
| Wooded grassland                | 7        | Evergreen needle leaf open forest                               | 121      | 1                                  | 1                           |
| Closed shrubland                | 8        | Deciduous needle leaf open forest                               | 123      | 0                                  | /                           |
| Open shrubland                  | 9        | Evergreen broad leaf open forest                                | 122      | 0                                  | /                           |
| Grassland                       | 10       | Deciduos broad leaf open forest                                 | 124      | 14678                              | 4                           |
| Cropland                        | 11       | Mixed open forest                                               | 125      | 0                                  | /                           |
| Bare ground                     | 12       | Unknown open forest type                                        | 126      | 192883                             | 5                           |
| Urban                           | 13       | Shrubland                                                       | 20       | 44105                              | 9                           |
| Water                           | 14       | Herbaceous vegetation                                           | 30       | 52007                              | 10                          |
|                                 |          | Herbaceous wetland                                              | 90       | 4151                               | 10                          |
|                                 |          | Moss & lichens                                                  | 100      | 0                                  | /                           |
|                                 |          | Bare/sparse vegetation                                          | 60       | 0                                  | /                           |
|                                 |          | Cropland                                                        | 40       | 1434823                            | 11                          |
|                                 |          | Urban/built up                                                  | 50       | 242714                             | 13                          |
|                                 |          | Snow & ice                                                      | 70       | 0                                  | /                           |
|                                 |          | Permanent water bodies                                          | 80       | 17798                              | 14                          |
|                                 |          | Ocean                                                           | 200      | 0                                  | /                           |
|                                 |          | No input data available                                         | 0        | 0                                  | /                           |

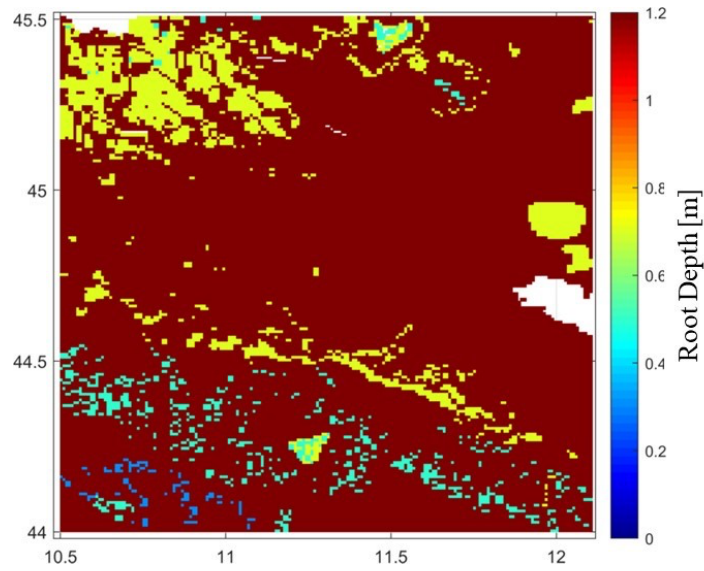

Figure S1: 1-km ESDAC root depth data; available at <https://esdac.jrc.ec.europa.eu/content/european-soil-database-derived-data>

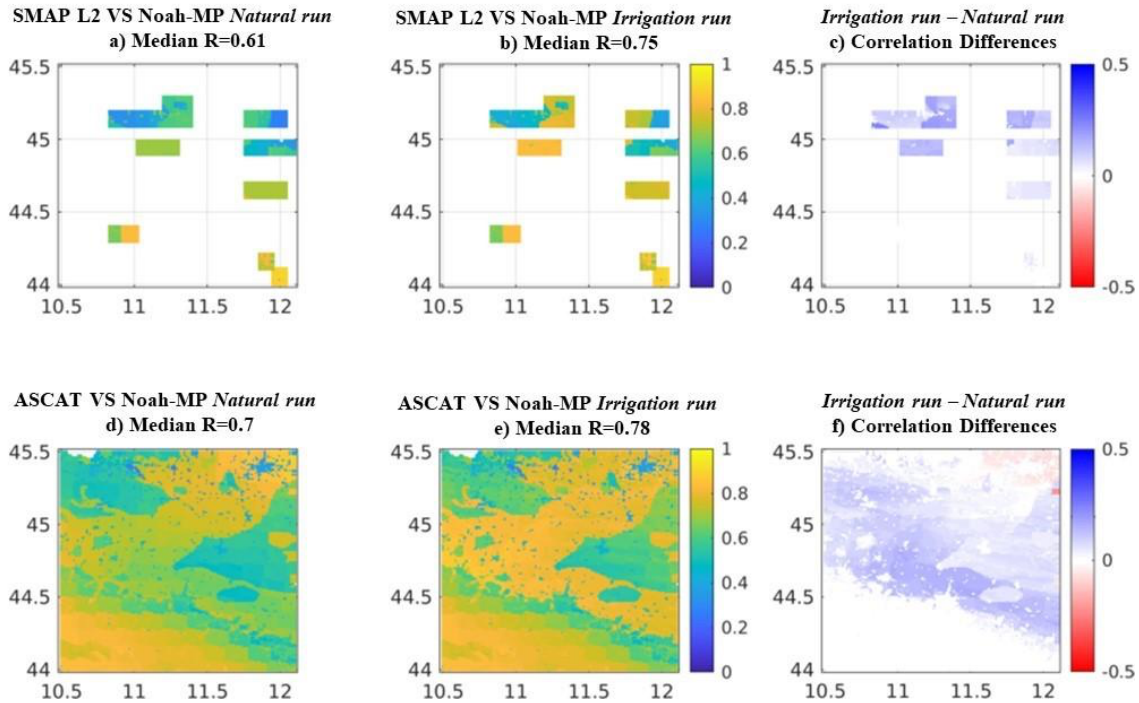

Figure S2: Maps of temporal Pearson-R between biweekly values of SSM from Noah MP: a) *Natural run* and SMAP L2; b) *Irrigation run* and SMAP L2; d) *Natural run* and ASCAT; e) *Irrigation run* and ASCAT. Maps of the Pearson-R differences display the grid-based difference between: c) map b and map a; f) map e and map d. The reference period is April 2015-December 2019.
